# Supplementary material for: HIF-1-miR-219-SMC4 Regulatory Pathway Promoting Proliferation and Migration of HCC under Hypoxic Condition
Source: Hindawi journal article supplement (doi:10.1155/2019/8983704), 2019-11-07
Supplement: f1 [file 8983704.f1.docx]

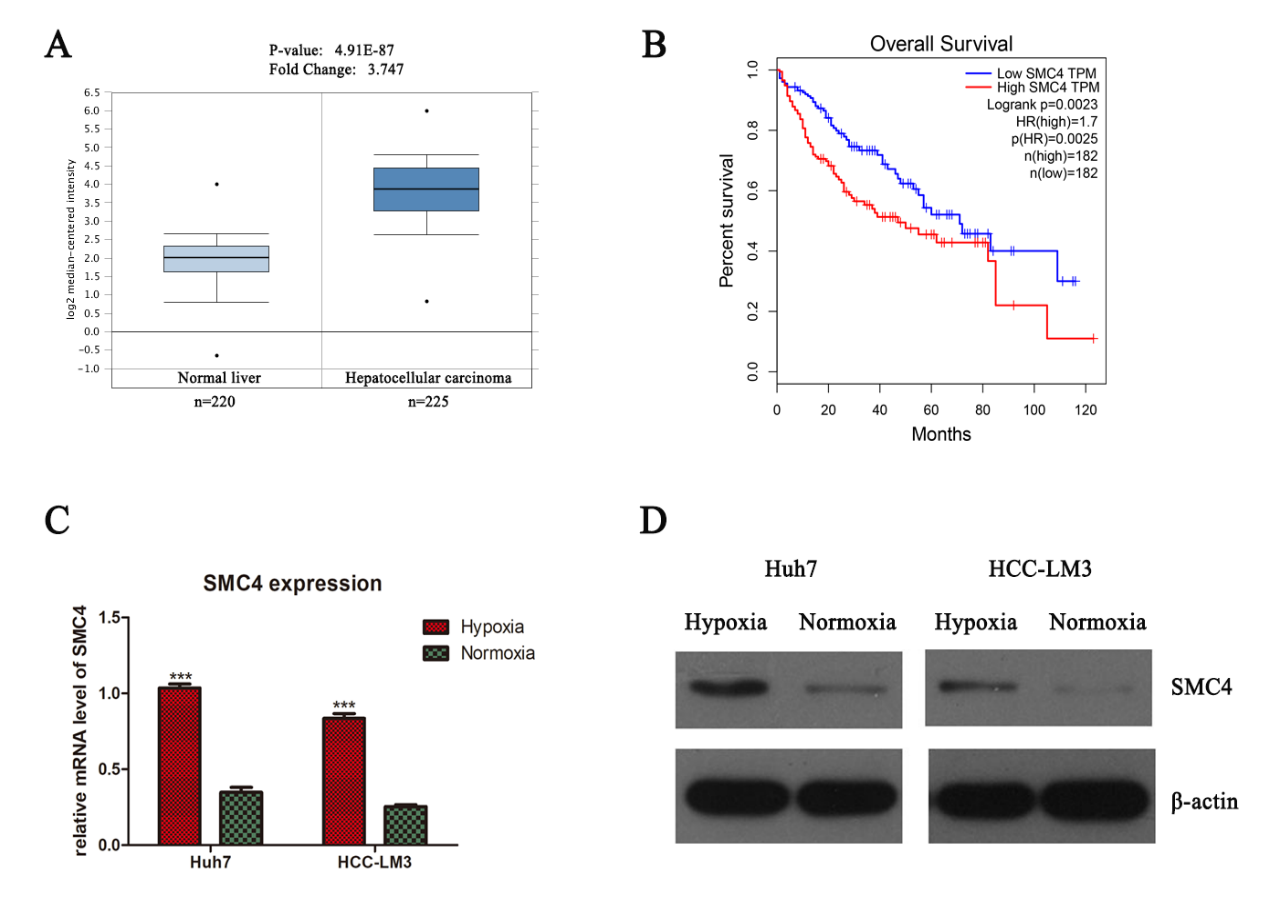


Supplement Figure1 (A-B) SMC4 was overexpressed in HCC tissues and overexpression of SMC4 was associated with poor prognosis of HCC patients. (C-D) expression of SMC4 was higher under hypoxia than normoxia both mRNA and protein levels. ***p<0.0001.


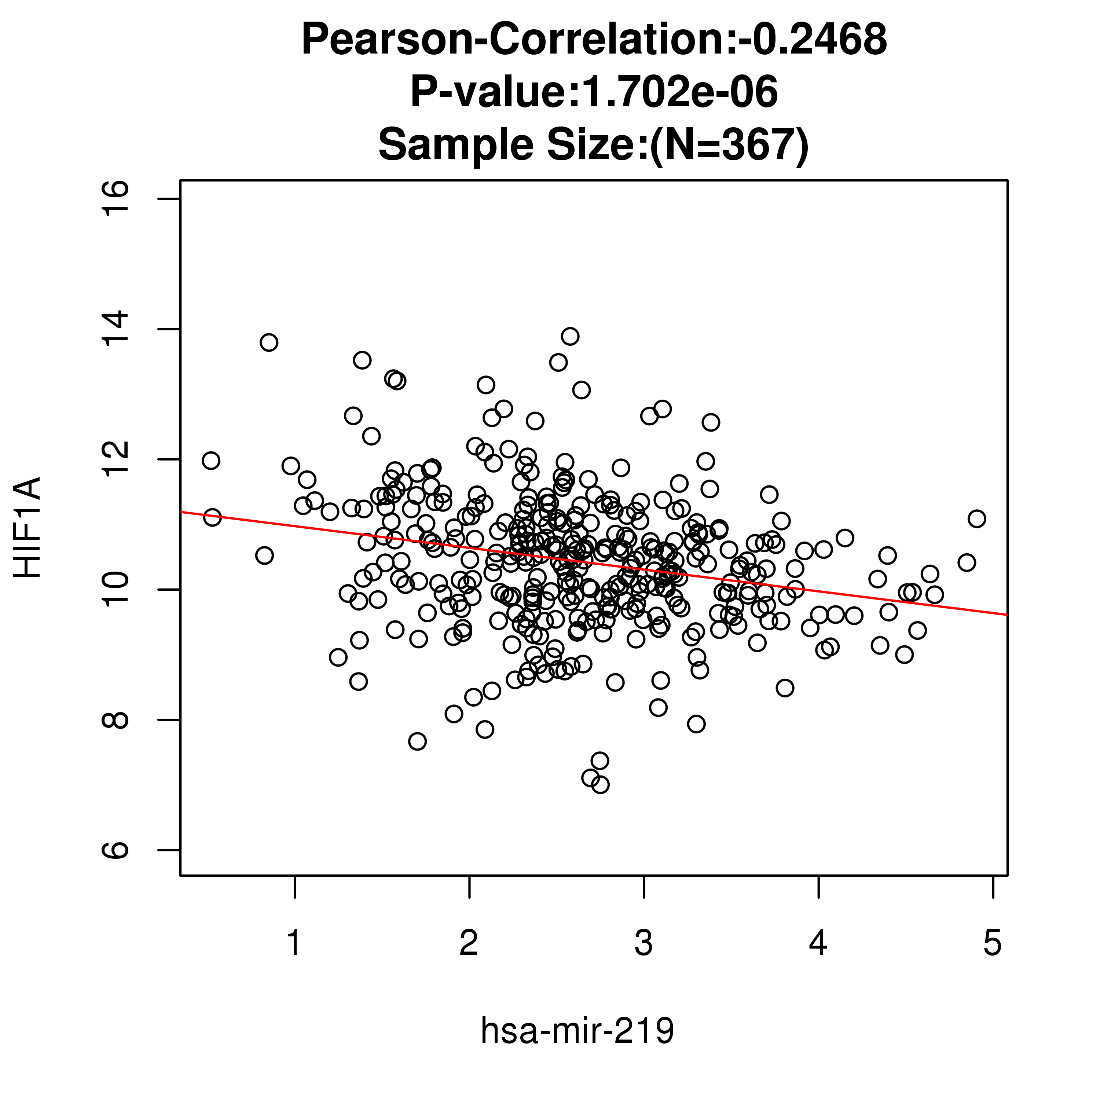


Supplement Figure2 Relationship between miR-219 and HIF1a in HCC tissues.
